# Supplementary material
Source: publisher site journal article supplement (https://static.cambridge.org/content/id/urn:cambridge.org:id:article:S1355617720000491/resource/name/S1355617720000491supp001.pdf)
Supplement: Supplementary file 1 [file S1355617720000491supp001.pdf]

**a****Time to first fixation (ms)****i**  
**Baseline**

Emotion

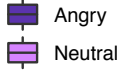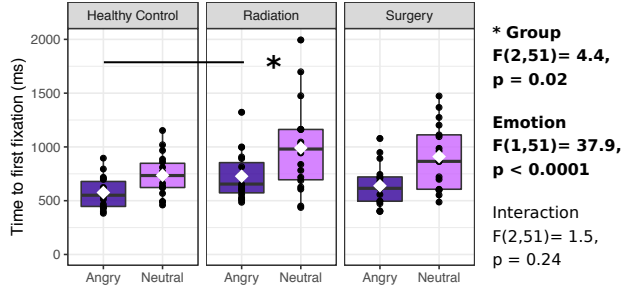**Regulate**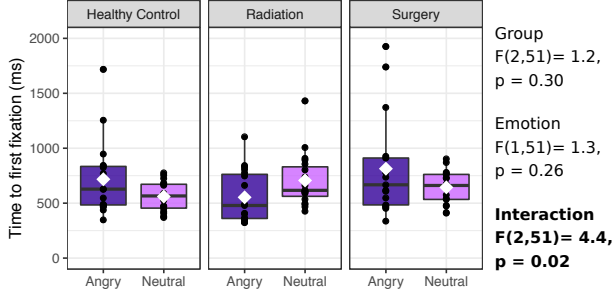**b****Probability of first fixation**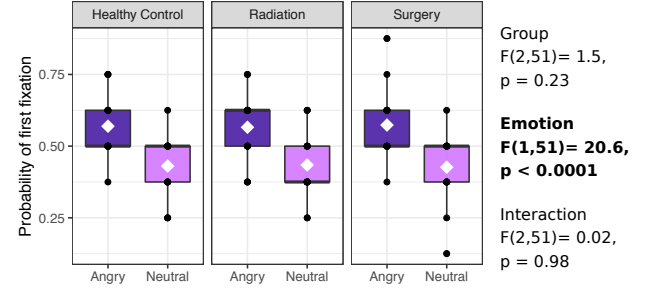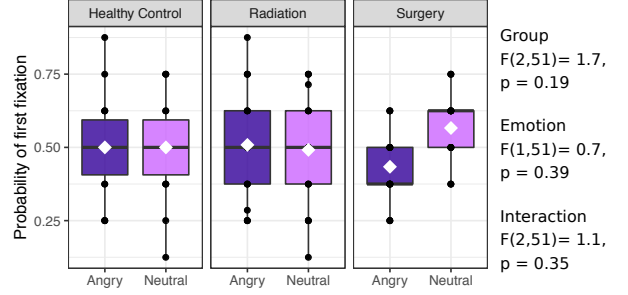**ii****Baseline**

Emotion

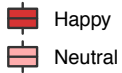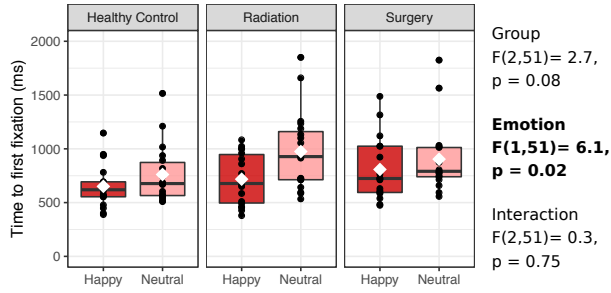**Regulate**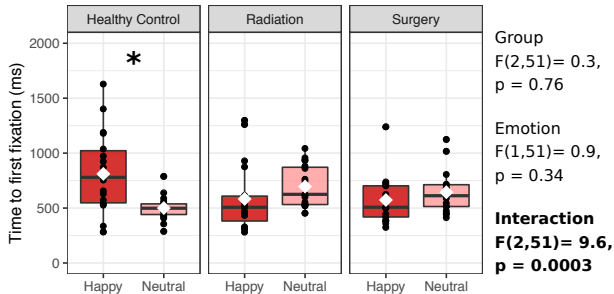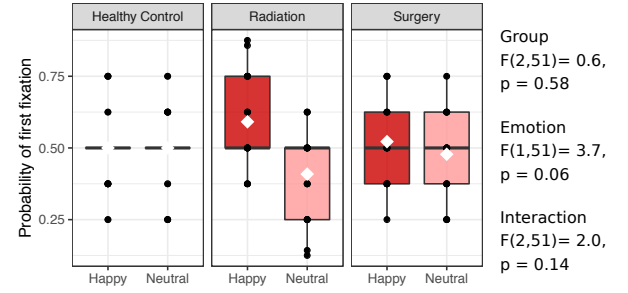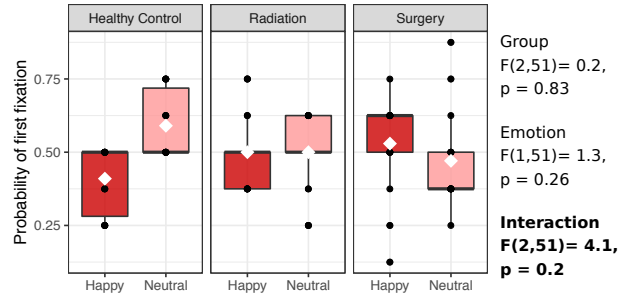**iii****Baseline**

Emotion

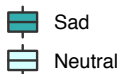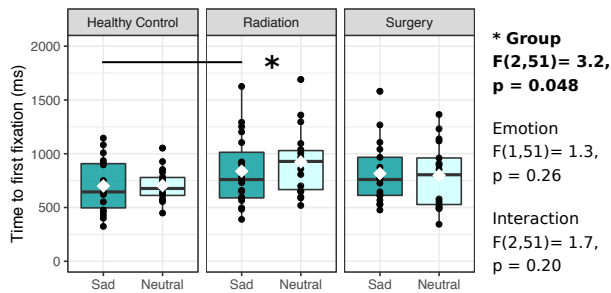**Regulate**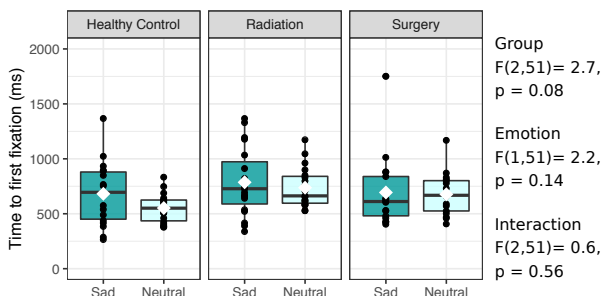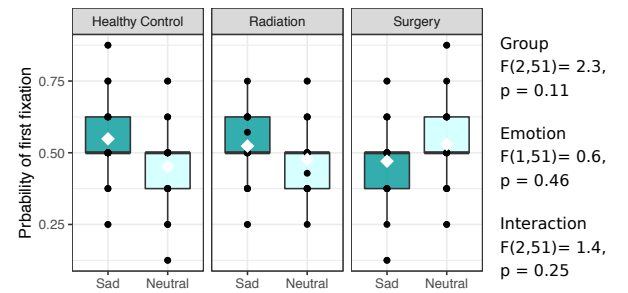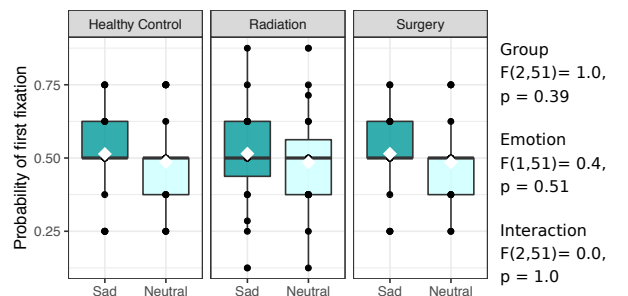

**Supplementary Figure 1. Attentional orienting to emotional faces. a-b.** Boxplots showing all data points with the mean (white diamond) and median (black line) for the (a) time to first fixation, and (b) probability of first fixation to the i. angry vs. neutral face, the ii. happy vs. neutral face, and the iii. sad vs. neutral face in the baseline (top panel) and regulate (bottom panel) conditions.

**a****Number of fixations****i**  
**Baseline**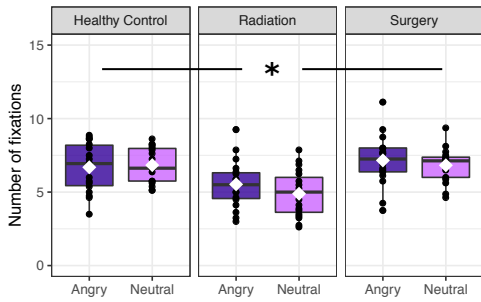

**\* Group**  
 $F(2,51) = 11.6$ ,  
 $p = 0.0001$

**Emotion**  
 $F(1,51) = 1.6$ ,  
 $p = 0.26$

**Interaction**  
 $F(2,51) = 0.90$ ,  
 $p = 0.40$

**Emotion**  

Angry  
Neutral

**Regulate**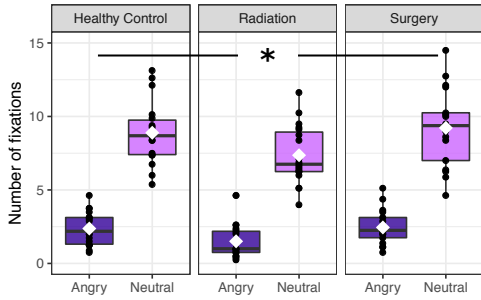

**\* Group**  
 $F(2,51) = 8.2$ ,  
 $p = 0.0008$

**Emotion**  
 $F(1,51) = 285.9$ ,  
 $p < 0.0001$

**Interaction**  
 $F(2,51) = 0.5$ ,  
 $p = 0.59$

**b****Dwell time (ms)**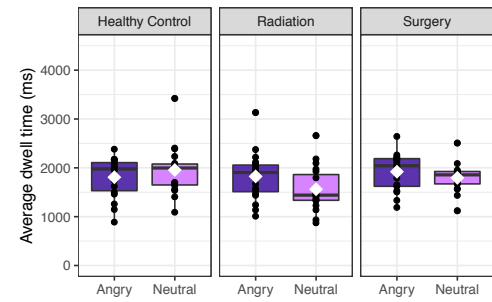

**Group**  
 $F(2,51) = 2.9$ ,  
 $p = 0.06$

**Emotion**  
 $F(1,51) = 0.7$ ,  
 $p = 0.40$

**Interaction**  
 $F(2,51) = 0.17$ ,  
 $p = 0.19$

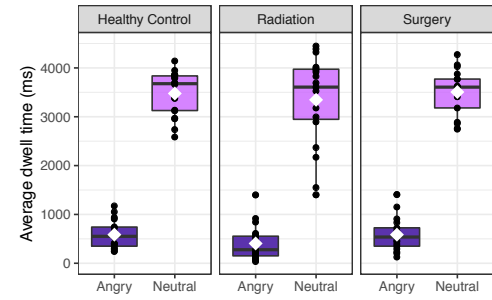

**Group**  
 $F(2,51) = 2.3$ ,  
 $p = 0.12$

**Emotion**  
 $F(1,51) = 572.6$ ,  
 $p < 0.0001$

**Interaction**  
 $F(2,51) = 0.02$ ,  
 $p = 0.99$

**ii****Baseline**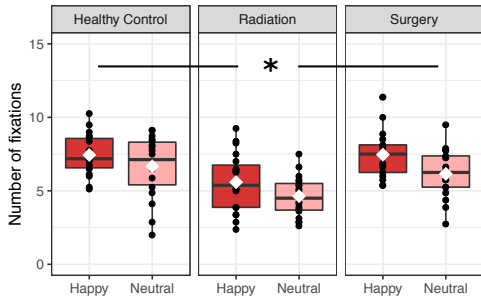

**\* Group**  
 $F(2,51) = 12.2$ ,  
 $p < 0.0001$

**Emotion**  
 $F(1,51) = 10.8$ ,  
 $p = 0.002$

**Interaction**  
 $F(2,51) = 0.2$ ,  
 $p = 0.78$

**Emotion**  

Happy  
Neutral

**Regulate**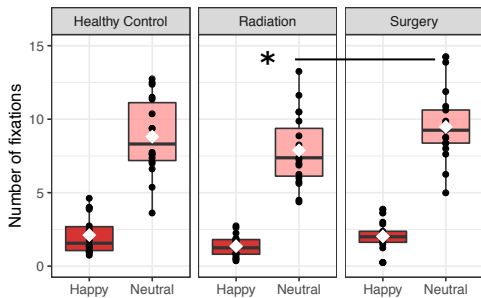

**\* Group**  
 $F(2,51) = 3.8$ ,  
 $p = 0.03$

**Emotion**  
 $F(1,51) = 338.4$ ,  
 $p < 0.0001$

**Interaction**  
 $F(2,51) = 0.6$ ,  
 $p = 0.57$

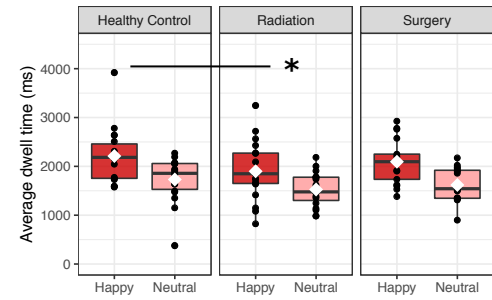

**\* Group**  
 $F(2,51) = 4.4$ ,  
 $p = 0.02$

**Emotion**  
 $F(1,51) = 17.3$ ,  
 $p = 0.0001$

**Interaction**  
 $F(2,51) = 0.1$ ,  
 $p = 0.90$

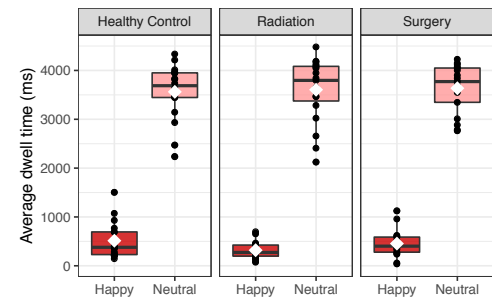

**Group**  
 $F(2,51) = 0.7$ ,  
 $p = 0.47$

**Emotion**  
 $F(1,51) = 872.0$ ,  
 $p < 0.0001$

**Interaction**  
 $F(2,51) = 0.4$ ,  
 $p = 0.66$

**iii****Baseline**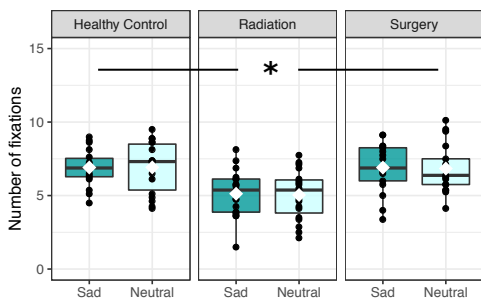

**\* Group**  
 $F(2,51) = 12.1$ ,  
 $p = 0.0001$

**Emotion**  
 $F(1,51) = 0.03$ ,  
 $p = 0.85$

**Interaction**  
 $F(2,51) = 0.01$ ,  
 $p = 0.99$

**Emotion**  

Sad  
Neutral

**Regulate**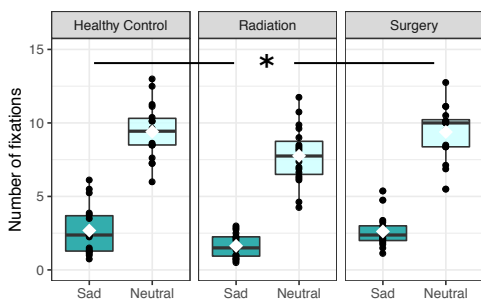

**\* Group**  
 $F(2,51) = 8.6$ ,  
 $p = 0.0006$

**Emotion**  
 $F(1,51) = 419.4$ ,  
 $p < 0.0001$

**Interaction**  
 $F(2,51) = 0.8$ ,  
 $p = 0.44$

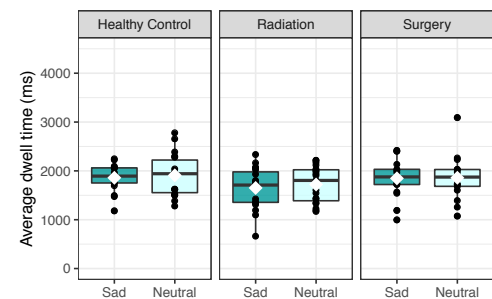

**Group**  
 $F(2,51) = 3.5$ ,  
 $p = 0.04$

**Emotion**  
 $F(1,51) = 0.3$ ,  
 $p = 0.60$

**Interaction**  
 $F(2,51) = 0.04$ ,  
 $p = 0.96$

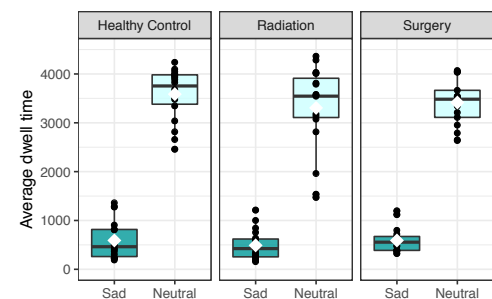

**Group**  
 $F(2,51) = 2.5$ ,  
 $p = 0.10$

**Emotion**  
 $F(1,51) = 583.1$ ,  
 $p < 0.0001$

**Interaction**  
 $F(2,51) = 0.2$ ,  
 $p = 0.78$

**Supplementary Figure 2. Attentional engagement of emotional faces. a-b.** Boxplots showing all data points with the mean (white diamond) and median (black line) for the (a) number of fixations, and (b) dwell time to the i. angry vs. neutral face, the ii. happy vs. neutral face, and the iii. sad vs. neutral face in the baseline (top panel) and regulate (bottom panel) conditions, over the course of the full trial (5 seconds). Note: although patients in the radiation group made fewer fixations than healthy controls and patients in the surgery groups, during both the baseline and regulate conditions, they did not differ in their dwell times, indicating they spent equivalent time viewing the faces despite making fewer fixations.
